# Supplementary material
Source: PubMed Central journal article supplement (PMC3818505)
Supplement: NIHMS509225-supplement-01.pdf [file NIHMS509225-supplement-01.pdf]

# Electronic Supplementary Information for Stabilization of the Inverse Laplace Transform of Multiexponential Decay through Introduction of a Second Dimension

Hasan Celik, Mustapha Bouhrara, David A. Reiter, Kenneth W. Fishbein,  
Richard G. Spencer\*

*Laboratory of Clinical Investigation, National Institute on Aging, National Institutes of  
Health, Baltimore, MD 21224*

---

---

## 1. Cramer-Rao Lower Bound Analysis

The advantage of the 2D approach as demonstrated in the paper is dependent upon the number of points,  $m$ , sampled in the indirect dimension, as well as the ratio  $R_{T_1}$  of the  $T_1$  relaxation time constants. We calculated the Cramer-Rao lower bound (CRLB) [1, 2, 3] as a function of  $m$ , using, as an example, a signal comprised of two with components  $(T_1, T_2, \text{weight}) = (25 \text{ ms}, 100 \text{ ms}, 60\%)$  and  $(35 \text{ ms}, 300 \text{ ms}, 40\%)$  at  $\text{SNR} = 100$ . Fig 1 shows that precision improved rapidly up to  $\sim m = 6$ , after which this improvement was less marked. We therefore selected  $m = 6$  in our simulations and experiments as representing a reasonable tradeoff between experimental speed and accuracy. Similarly, we found the 2D approach to provide no benefit in the case of equal component  $T_1$ 's, and to become increasingly advantageous with increasing difference between  $T_1$  relaxation time constants (Fig. 2). Substantial improvements were seen for  $R_{T_1} > \sim 1.5$ , with the degree of improvement tapering off for  $R_{T_1} > 2$ . It is clear that these results for  $m$  and  $R_{T_1}$  must be regarded as representative; they will clearly be dependent upon component SNR,  $T_2$ s and weights.

---

\*Corresponding author, Phone:+1-949-824-8509, Fax:+1-410-558-8318  
Email address: [spencerri@mail.nih.gov](mailto:spencerri@mail.nih.gov) (Richard G. Spencer)

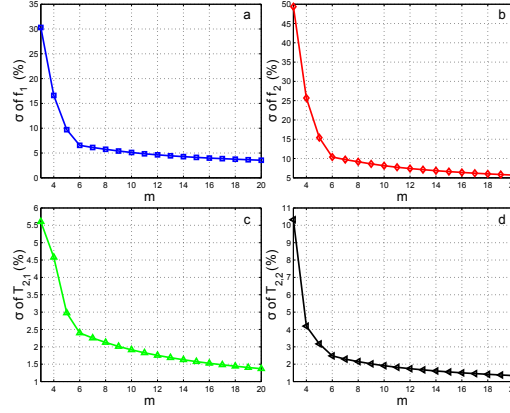

Figure 1: Cramer-Rao lower bound as a function of  $m$  for a simulated signal with two components with  $(T_1, T_2, \text{weight}) = (25 \text{ ms}, 100 \text{ ms}, 60\%)$  and  $(35 \text{ ms}, 300 \text{ ms}, 40\%)$  at  $\text{SNR} = 100$ .

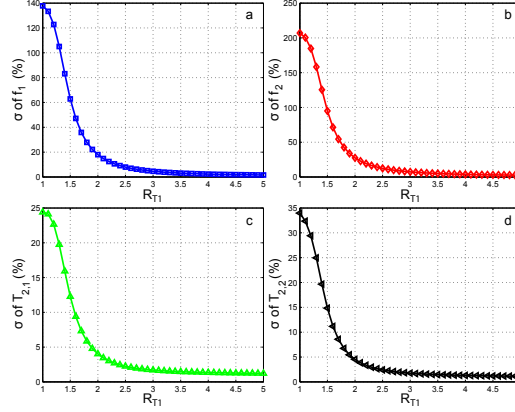

Figure 2: Cramer-Rao lower bound as a function of the ratio  $R_{T1}$  of the  $T_1$  relaxation time constants for a simulated signal with two components with  $(T_1, T_2, \text{weight}) = (25 \text{ ms}, 100 \text{ ms}, 60\%)$  and  $(35 \text{ ms}, R_{T1} \times 100 \text{ ms}, 40\%)$  at  $\text{SNR} = 100$ .

- [1] A. Anastasiou, L. D. Hall, Optimisation of t-2 and m-0 measurements of bi-exponential systems, Magnetic Resonance Imaging 22 (1) (2004) 67–80.
- [2] H. Cramer, Mathematical methods of statistics, Princeton university press, 1946.
- [3] C. R. Rao, Information and the accuracy attainable in the estimation of

statistical parameters, Bull. Calcutta Math. Soc. (37) (1945) 81–91.
